# Supplementary material for: Cholangiocyte glycocalyx degradation boosts primary sclerosing cholangitis
Source: bioRxiv or medRxiv preprint supplement (doi:10.1101/2024.06.27.24309484), 2024-06-28

Extended Data Figure 1

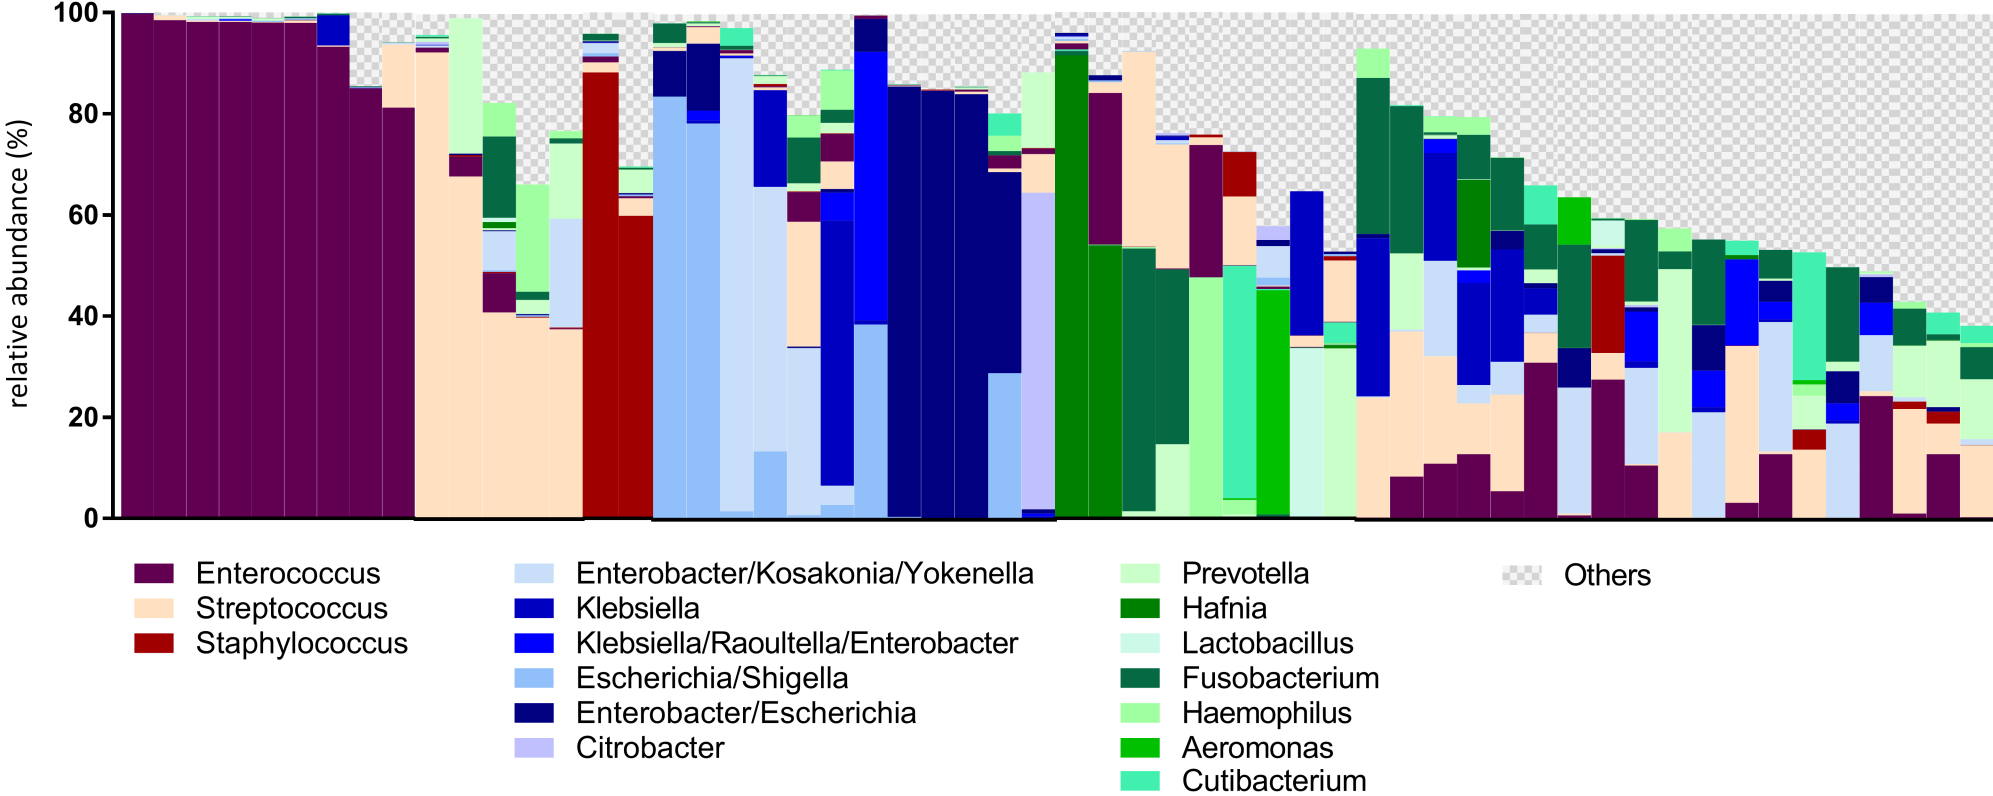

Supplement: Supplementary file [file media-1.pdf]
